# Supplementary material for: A surfactant reaction model for the reciprocating motion of a self-propelled droplet
Source: Royal Society of Chemistry journal article supplement (doi:10.1039/d0sm01500h), 2020-10-22
Supplement: d0sm01500h3.pdf [file d0sm01500h3.pdf]

## Supplementary Information: A surfactants reaction model for reciprocating motion of a self-propelled droplet

S. Tanaka, N. Nakata, and M. Nagayama

### Descriptions of movies

- **exp\_uni.avi**  
An experimental real time movie of a droplet moving unidirectionally.  $s = 35$  mM.
- **exp\_rec.avi**  
Same as exp\_uni.mp4, but in a reciprocating mode of motion.  $s = 21$  mM.
- **sim\_uni.avi**  
A simulation movie of a particle in a unidirectional mode of motion.  $\hat{a}_1 = 16.0$ ,  $\hat{a}_2 = 8.0$ , and  $\hat{a}_3 = 1.0$ .
- **sim\_rec.avi**  
Same as sim\_uni.mp4 but in a reciprocating mode of motion.  $\hat{a}_1 = 64.0$ ,  $\hat{a}_2 = 20.0$ , and  $\hat{a}_3 = 1.0$ .
- **dist\_uni.avi**  
A simulation movie of concentration distribution together with normalized surface tension force acting on a particle in a unidirectional mode of motion.  $\hat{a}_1 = 16.0$ ,  $\hat{a}_2 = 8.0$ , and  $\hat{a}_3 = 1.0$ . In the movie,  $c_1$  is ES concentration,  $c_2$  is SDS concentration, and  $F$  is  $\hat{F}_\gamma/\hat{a}_4$ .
- **dist\_rec.avi**  
Same as dist\_uni.mp4, but in a reciprocating mode of motion.  $\hat{a}_1 = 64.0$ ,  $\hat{a}_2 = 20.0$ , and  $\hat{a}_3 = 1.0$ .

### The effect of nonlinear reaction

In the main text, we assumed the simplest possible reaction between ES and SDS,  $-a_2c_1c_2$ . But if ES molecules are dissolved in micelles of SDS, the reaction should be nonlinear. Our previous work (Fig. 6 in [19]) suggests that a ES molecule reacts with four SDS molecules. In this case, the reaction term should be  $-a_2c_1c_2^4$ . We tested this reaction term and constructed bifurcation diagrams

as shown in the Fig. 1. The results suggest that the effect of the nonlinear reaction is only to shift the position of bifurcations, and that the essential features of phenomena remain.

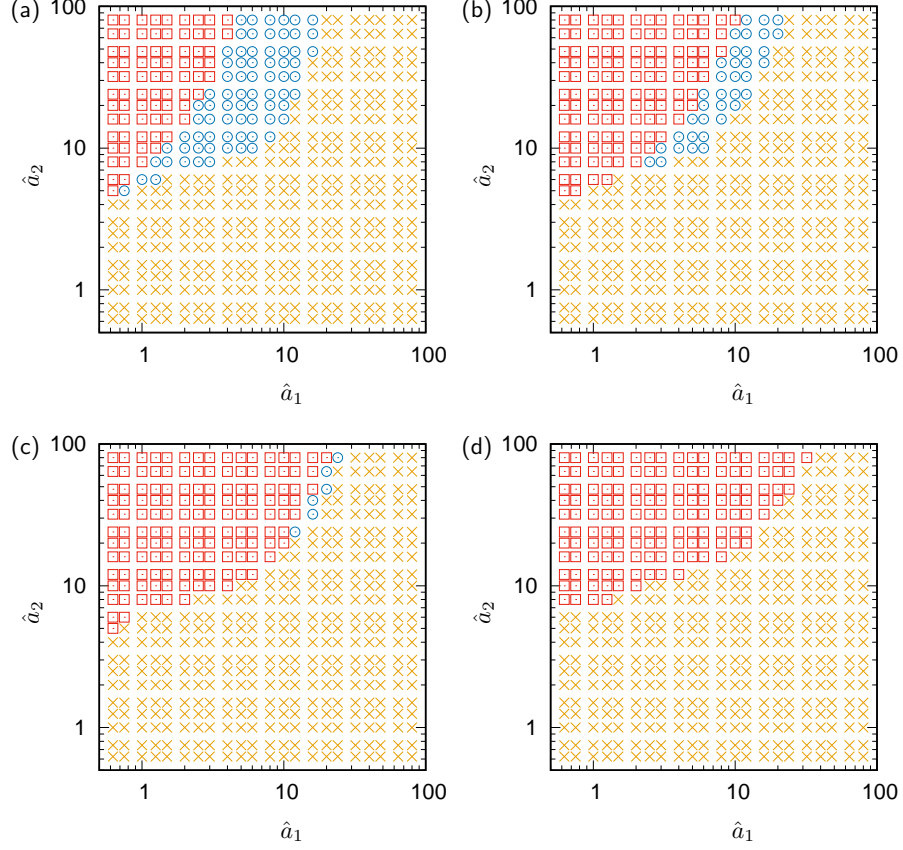

Figure 1: Bifurcation diagrams constructed under a nonlinear reaction,  $-a_2c_1c_2^4$  instead of  $-a_2c_1c_2$ . Crosses, circles, and squares, respectively represent unidirectional motions, reciprocations, and stationary states. (a)  $\hat{a}_3 = 1.0$ . (b)  $\hat{a}_3 = 2.0$ . (c)  $\hat{a}_3 = 4.0$ . (d)  $\hat{a}_3 = 8.0$ .
